# Supplementary material for: Endogenous p53 expression in human and mouse is not regulated by its 3′UTR
Source: eLife. 2021 May 6;10:e65700. doi: 10.7554/eLife.65700 (PMC8137139; doi:10.7554/eLife.65700)
Supplement: Figure 2—source data 1. [file elife-65700-fig2-data1.xlsx]

## Sheet: Sheet1
	data represent realtive p53 protein expression levels normalized to actin in independent experiments.
	Figure 2D	WT						Ctrl #1				dUTR #1
	Eto [uM]	Rep1	Rep2	Rep3	Rep4	Rep5	Rep6	Rep1	Rep2	Rep3	Rep4	Rep1	Rep2	Rep3	Rep4	Rep5
	0	1	1	1	1	1	1	0.717984	0.785994	0.898506	0.915663	1.35913	1.21142	0.926862	0.913173	0.682964
	0.5		1.19889	0.937483	0.887715	0.963471	0.941265	1.38537	0.834116	0.993464	1.04613		1.34347	0.730973	1.03656	0.669344
	2	1.1509	1.4217	1.3815	1.3029	1.14486	1.24658	1.70973	2.05746	0.758142	1.1747	1.36511	1.816	1.25543	1.63099	0.804534
	8	2.14931	2.35553	2.07937	2.41311	2.23738	2.05051	2.8471	2.56317	1.24667	2.03027	2.16624	2.55527	1.98261	2.33488	1.35921
	32		3.08157	2.70319	3.50555	3.47496	3.19864	3.21993	3.84475	2.41923	2.81066		3.03451	2.21977	2.58153	2.68013
	Figure 2F	WT			Ctrl #1			dUTR #1
	Eto 0.5 uM [h]	Rep1	Rep2	Rep3	Rep1	Rep2	Rep3	Rep1	Rep2	Rep3
	0	1	1	1	1.18687	1.13983	0.871734	0.873737	1.17797	1.02138
	24	2.0202	2.29237	1.90024	2.0101	2.26695	1.47268	2.32323	1.97881	1.66271
	48	3.06566	3.36441	2.71971	3.42424	4.11441	2.38717	3.39899	3.21186	2.31591
