# Supplementary material for: Endogenous p53 expression in human and mouse is not regulated by its 3′UTR
Source: eLife. 2021 May 6;10:e65700. doi: 10.7554/eLife.65700 (PMC8137139; doi:10.7554/eLife.65700)
Supplement: Figure 3—source data 1. [file elife-65700-fig3-data1.xlsx]

## Sheet: Sheet1
	data represent realtive p53 protein expression levels normalized to actin in independent experiments.
	Figure 3B	WT				Ctrl #1				dUTR #1
	Nutlin-3 [uM]	Rep1	Rep2	Rep3	Rep4	Rep1	Rep2	Rep3	Rep4	Rep1	Rep2	Rep3	Rep4
	0	1	1	1	1	0.658205	0.915445	1.35193	0.498858	0.672257	1.32226	0.923272	1
	1.25	1.94798	1.61802	2.57328	3.23228	1.3934	0.934431	1.37784	2.3936	1.05134	1.75511	3.53815	3.05062
	2.5	2.13962	2.96965	2.5843	4.37299	2.58137	1.278	1.96952	4.18733	1.74768	2.47613	3.02317	3.7402
	5	2.58854	4.07566	3.27462	5.40924	3.01237	2.43163	3.86266	5.19804	2.20172	3.32324	3.86998	4.57092
	10	2.80383	4.51235	4.20883	5.99077	3.59131	3.05158	5.30466	4.74728	2.32354	3.23502	4.30705	4.59684
	20	3.00135	4.10697	5.17995	5.63194	5.10401	3.78092	6.28659	4.88018	2.62305	3.71276	5.55442	6.21798
