# Supplementary material for: Endogenous p53 expression in human and mouse is not regulated by its 3′UTR
Source: eLife. 2021 May 6;10:e65700. doi: 10.7554/eLife.65700 (PMC8137139; doi:10.7554/eLife.65700)
Supplement: Supplementary file 1. [file elife-65700-supp1.xlsx]

## Sheet: RT-qPCR primer
Species	Application	Gene	forward primer	reverse pimer	amplicon length in bp	comment
Human	Screening, deletion-spanning	TP53	CAGTCTACCTCCCGCCATAA	CCAGTCTCCAGCCTTTGTTC	1409 vs 362
Human	Screening, WT 3'UTR 5'end	TP53	CAGTCTACCTCCCGCCATAA	CCACAACAAAACACCAGTGC	246
Human	Screening, WT 3'UTR 3'end	TP53	GAGTGGAGTGGCGTGATCTT	CCAGTCTCCAGCCTTTGTTC	536
Mouse	Screening, deletion-spanning	Trp53	CCCAAACTGCTAGCTCCCATCACT	CCTGACTCCAACAGACTGCCTGG	682 vs 387
Human	Northern blot probe, CDS	TP53	CATGAGCGCTGCTCAGATAG	CAAGGCCTCATTCAGCTCTC	510
Human	Northern blot probe, 3'UTR	TP53	GGCCCACTTCACCGTACTAA	TGCAGTAAGCCAAGATCACG	530
Human	RT-qPCR	GAPDH	GCACCGTCAAGGCTGAGAAC	TGGTGAAGACGCCAGTGGA	138
Human	RT-qPCR	TP53	CACATGACGGAGGTTGTGAG	ACACGCAAATTTCCTTCCAC	107
Mouse	RT-qPCR	Gapdh	AGGTCGGTGTGAACGGATTTG	TGTAGACCATGTAGTTGAGGTCA	123
Mouse	RT-qPCR	Trp53	CACAGCACATGACGGAGGTC	TCCTTCCACCCGGATAAGATG	101
Mouse	RT-qPCR	Cdkn1a	CCTGGTGATGTCCGACCTG	CCATGAGCGCATCGCAATC	103
synthetic	RT-qPCR	eGFP	GAACGGCATCAAGGTGAACT	TGCTCAGGTAGTGGTTGTCG	134
Human	Cloning of CDS (HindIII/BamHI)	TP53_CDS	ACTTAAGCTTATGGAGGAGCCGCAGTCAGATCC	TGCAGGATCCGTCTGAGTCAGGCCCTTCTG	1198
Human	Cloning of 3'UTR (EcoRI/NotI)	TP53_3UTR	GAGAGAATTCCATTCTCCACTTCTTGTTCCC	CCTGGCGGCCGCCACCCCTCAGACACACAGGTGG	1229
Human	Cloning of dUTR (EcoRI/NotI)	TP53_dUTR	GAGAGAATTCCATTCTCCACTTCGGAAGGGTC	CCTGGCGGCCGCCACCCCTCAGACACACAGGTGG	182
Human	Cloning of gRNA into pX330	TP53dUTR1	CACCGTGTCAGTGGGGAACAAGAAG	AAACCTTCTTGTTCCCCACTGACAC		annealed
Human	Cloning of gRNA into pX330	TP53dUTR2.1	CACCGAAGATGTTGACCCTTCCAGC	AAACGCTGGAAGGGTCAACATCTTC		annealed
Human	Cloning of gRNA into pX330	TP53dUTR2.2	CACCGTTGACCCTTCCAGCTGGACG	AAACCGTCCAGCTGGAAGGGTCAAC		annealed
Human	Cloning of gRNA into pX330	TP53KO	CACCGAGTGGAAGGAAATTTGCGTG	AAACCACGCAAATTTCCTTCCACTC		annealed
Mouse	CRISPR RNP formation	Trp53_gRNA upstream	GTGATGGGGACGGGATGCAG			part of Alt-R crRNA ordered from IDT
Mouse	CRISPR RNP formation	Trp53_gRNA downstream	CATAGGGTCCATATC CTCCA			part of Alt-R crRNA ordered from IDT
Human	Cloning of CDS (HindIII/BamHI)	TP53_CDS	ACTTAAGCTTATGGAGGAGCCGCAGTCAGATCC	TGCAGGATCCGTCTGAGTCAGGCCCTTCTG	1198
Human	Cloning of 3'UTR (EcoRV/NotI)	GAPDH_3UTR	CACAGATATCGACCCCTGGACCACCAGCC	CACAGCGGCCGCGGTTGAGCACAGGGTACTTTATTG	222
Human	Cloning of 3'UTR (EcoRV/NotI)	PGK1_3UTR	GCCGAGATATCTACTTTCCTGCCTTTTAGTTCCTGT	GGACCAGCGGCCGCAATCACGGTTTCAATGGACACTTT	470
Human	Cloning of 3'UTR (EcoRV/NotI)	HPRT_3UTR	GCCGAGATATCGATGAGAGTTCAAGTTGAGTTTGG	GGACCAGCGGCCGCTTAAATTTTTGGGAATTTATTGATTTGCATTTA	616
Human	Cloning of 3'UTR (EcoRV/NotI)	TP53_3UTR_w/oU_up	GAGAGAATTCCATTCTCCACTTCTTGTTCCC	GCGAGACCCAGTCTCTTGACCCTGAGCATAAAACAAG	768
Human	Cloning of 3'UTR (EcoRV/NotI)	TP53_3UTR_w/oU_down	ATGCTCAGGGTCAAGAGACTGGGTCTCGCTTTGTTG	CCTGGCGGCCGCCACCCCTCAGACACACAGGTGG	452
Human	Cloning of 5'UTR (NheI/HindIII)	TP53_5UTR	GGACCGGCTAGCGATGGGATTGGGGTTTTCCCCTCCCATGTGCTCAAGACTGGCGCTAAAAGTTTTGAGCTTCTCAAAAGTCTAGAGCCACCGTCCAGGGAGCAGGTAGCTGCTGGGCTCCGGGGACACTTTGCGTTCGGGCTGGGAGCGTGCTTTCCACGACGGTGACACGCTTCCCTGGATTGGCAGCCAGACTGCCTTCCGGGTCACTGCCAAGCTTGGACCG			synthesized as dsDNA FragmentGENE from Genewiz
S. cerevisiae	RT-qPCR	ACT1	TGGATTCCGGTGATGGTGTT	ACCGGCCAAATCGATTCTCA	89
S. cerevisiae	RT-qPCR	ALG9	CCGCATTCGACTGCTGTTTG	CAGGAGCAAGCTTCCCGTAA	87
