# Supplementary figures and images for: Endogenous p53 expression in human and mouse is not regulated by its 3′UTR
Source: eLife journal article supplement (doi:10.7554/elife.65700), 2021-05-06

Mitschka, Figure 1-figure supplement 1

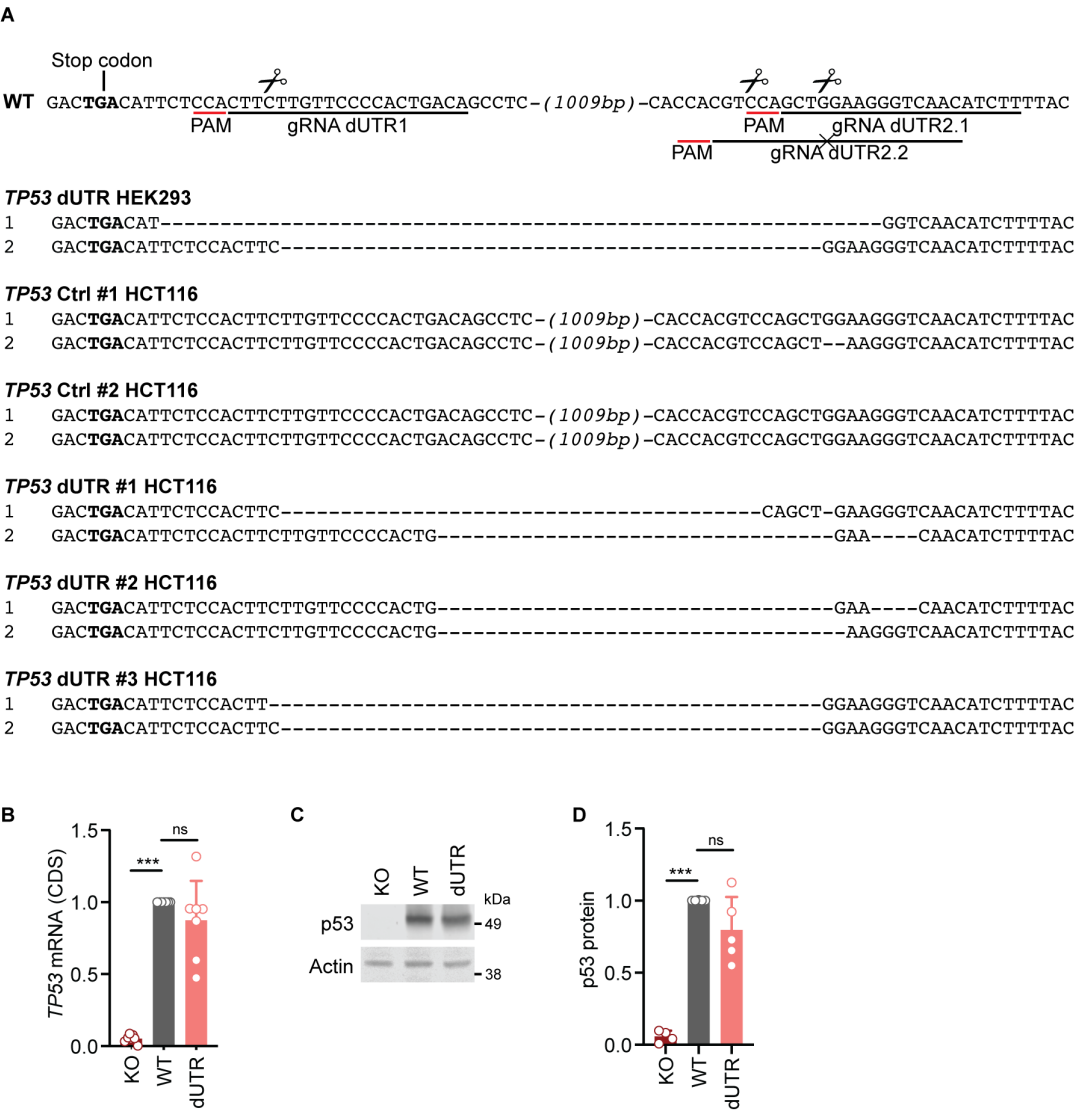

Supplement: supp [file elife_poa_e65700_Figure_1_figure_supplement_1.pdf › elife_poa_e65700_Figure_1_figure_supplement_1.pdf]

Mitschka, Figure 2-figure supplement 2

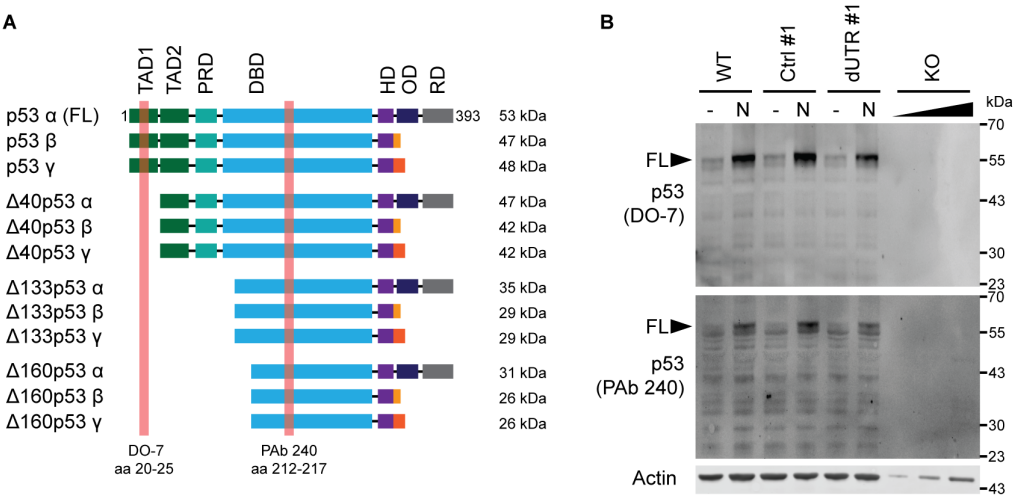

Supplement: supp [file elife_poa_e65700_Figure_2_figure_supplement_1.pdf › elife_poa_e65700_Figure_2_figure_supplement_1.pdf]

Mitschka, Figure 4-figure supplement 1

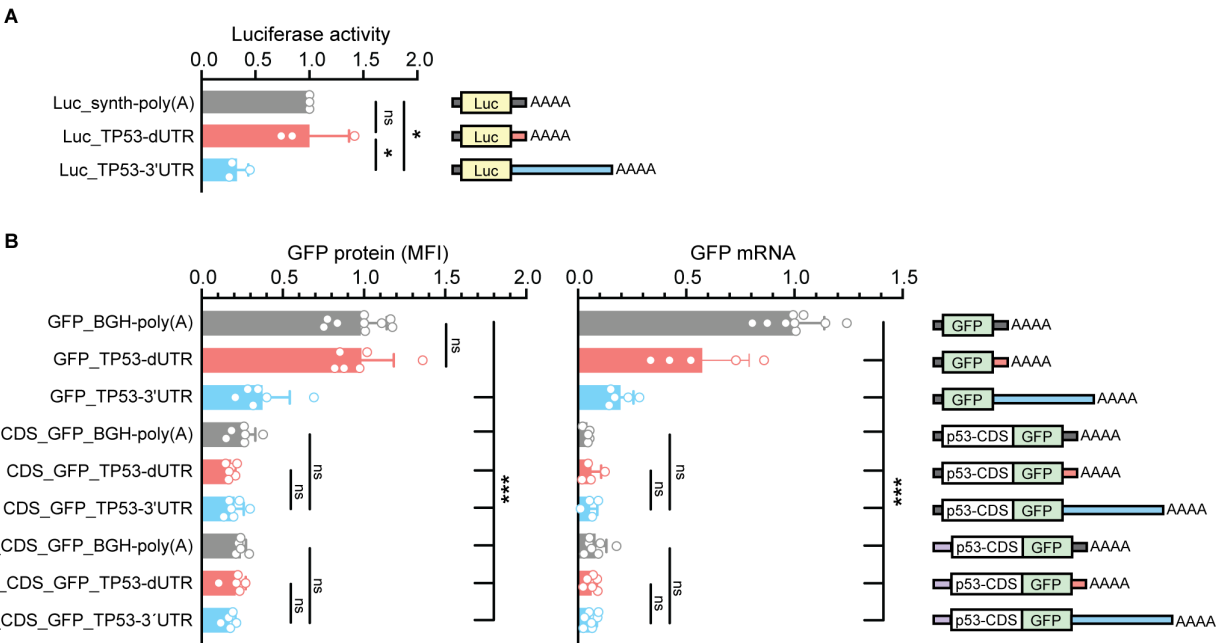

Supplement: supp [file elife_poa_e65700_Figure_4_figure_supplement_1.pdf › elife_poa_e65700_Figure_4_figure_supplement_1.pdf]

Mitschka, Figure 5-figure supplement 1

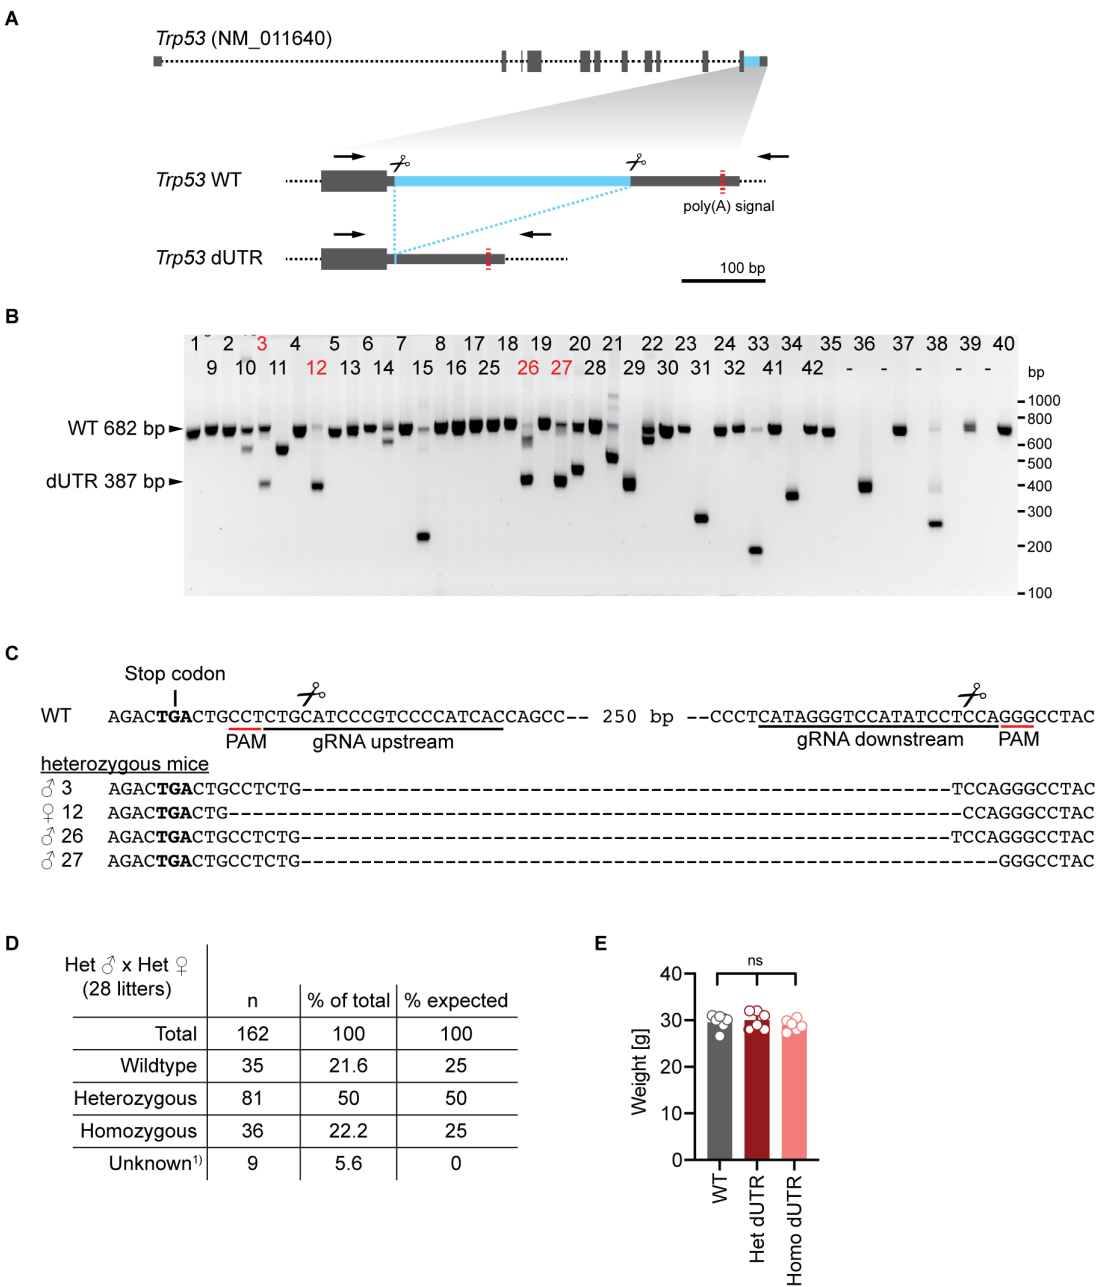

Supplement: supp [file elife_poa_e65700_Figure_5_figure_supplement_1.pdf › elife_poa_e65700_Figure_5_figure_supplement_1.pdf]

Mitschka, Figure 5- figure supplement 2

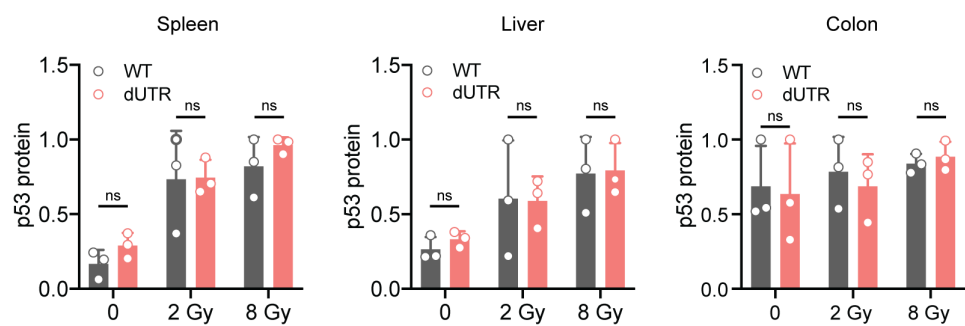

Supplement: supp [file elife_poa_e65700_Figure_5_figure_supplement_2.pdf › elife_poa_e65700_Figure_5_figure_supplement_2.pdf]
